# Supplementary material for: Multi-fidelity model assessment of climate change impacts on river water temperatures, thermal extremes and potential effects on cold water fish in Switzerland
Source: Copernicus journal article supplement (doi:10.5194/egusphere-2024-3957), 2025-02-17
Supplement: Supplementary file [file egusphere-2024-3957-AC1-supplement.pdf]

We thank the reviewer for constructive comments and provide our answers hereunder.

## RC1

RC1: 'Comment on egusphere-2024-3957', Anonymous Referee #1, 18 Mar 2025 reply

This is my review of "Multi-fidelity model assessment of climate change impacts on river water temperatures, thermal extremes and potential effects on cold water fish in Switzerland" by Love Raman Vinna et al., submitted to Hydrology and Earth System Sciences. In this paper, the authors combine an ensemble of climate models, hydrological models and two water temperature models with varying parameter settings per station to derive water temperature projections in Swiss rivers. In addition, they determined future changes in projected extremes, hysteresis effects and impacts on brown trout. I found the study interesting, with sound methodology. However, the manuscript would benefit from a clearer presentation to fully convey its strengths. I therefore suggest minor revisions, and I provide comments below to help improve these aspects.

Major comments:

While comprehensive and detailed, the data and methods section is somewhat difficult to follow due to its length and repetition. I recommend a thorough revision to improve its structure and conciseness, eliminating redundant wording. This will enhance readability and streamline the section. Below, I provide specific examples and suggestions to support this refinement.

Section 2 has been adjusted to make it clearer for the reader, see below for specific changes.

The structure has been improved by separating the entire text into more thematically related paragraphs.

The "Material & Methods"-section now is written more concise resulting in a text reduction of 3725 to 1529 characters (with spacings), following the suggestion of the reviewer one paragraph has been moved to the "Introduction"-section.

The "Data"-section now is written more concise by omitting redundant wording on used circulation and hydrological models.

The presentation of results could be refined to enhance clarity and readability. Figures 4, 6, and 7, along with Table 3, contain a wealth of information, but an additional or alternative figure presenting the data in a more aggregated way—such as by thermal regime—could help highlight key differences more effectively while still accounting for uncertainty. While the station-based results provide valuable detail, incorporating more synthesized figures or tables could make the main findings more accessible. Additionally, summarizing key insights more narratively, rather than listing numbers extensively, may improve the flow of the results section.

We prepared a figure that summarizes the entire range of individual evaluations for each regime. We do not consider this to be the right approach and would prefer to omit this type of presentation of the results.

Specific comments:

Title: the “cold water fish” might suggest a more elaborate analysis on general fish species when only brown trout is considered in the analysis. Suggestion to rephrase/remove.

Title changed to: Multi-fidelity model assessment of climate change impacts on river water temperatures, thermal extremes and potential effects on brown trout in Switzerland

L 16-18, abstract: Provide more detailed “Alpine thermal regime” and “Downstream lake regime”.

Results have been added to the Abstract: Line 13 to 19 in revised manuscript now reads>

Results show that, until the end of the 21<sup>st</sup> century, average river water temperatures in Switzerland will likely increase by  $3.1 \pm 0.7$  °C (or  $0.36 \pm 0.1$  °C per decade) under RCP8.5, while under RCP2.6 the temperature increase may remain at  $0.9 \pm 0.3$  °C ( $0.12 \pm 0.1$  °C per decade). Under RCP8.5, temperatures of rivers classified as being in the *Alpine* thermal regime will increase the most, that is, by  $3.5 \pm 0.5$  °C, followed by rivers of the *Downstream Lake* regime, which will increase  $3.4 \pm 0.5$  °C. Under RCP2.6 temperatures in the Alpine and Downstream lake regimes change most with  $+1.15$  and  $+0.99 \pm 0.5$  °C.

The introduction could benefit from a better gap description, and background building up to this gap description, for example highlighting the gaps of current water temperature projections for Switzerland available in literature. Also, since part of the novelty of the study lies in the modelling approach employed, this gap can also be made more apparent.

Added to introduction line 99: Compared to previous projections of climate warming in Swiss rivers (Michel et al., 2022), the simplified multi-fidelity modelling approach enables a wider investigation area (+90%) including 5 thermal regimes (previous 2) and 22 GCM-RCM chains (previously 7).

Figure 1: Good overview figure, although it would benefit from a distinction between data and data sources and operations on that data in the flow chart. This is an open suggestion

Additional detail has been added to the figure in the revised manuscript.

L73-92: this is a very general explanation about the choice of models to use, I would suggest to move it to the intro

We agree and have moved this to section 1 lines 60 to 79.

L126-138: can you give a little more extensive description of the CH2018 climate data? E.g. introduce that they are derived from the EURO-CORDEX regional climate modelling ensemble, with the number of RCMs driven by GCMs and future scenarios, as well as the horizontal resolution. These names return then in Table 1, allowing the reader to understand where they come from.

Added to line 145: Here we use CH2018 climate simulations based on the EURO-CORDEX regional climate modelling ensemble, for which near-surface air temperatures have been downscaled to local conditions with quantile mapping (CH2018, 2018). CH2018 comprises

simulations of 9 GCM coupled to 8 RCM runs for a total of 22 GCM-RCM model chains with 0.11° and 0.44° resolution under 3 climate change scenarios (RCP2.6, 4.5, and 8.5).

L130- ...It would help to also introduce the Hydro-CH2018 in a little bit more detail afterwards, with a subclause per hydrological model on its characteristics (semi-distributed, empirical etc). A suggestion is to structure the description of the different data sources with different subtitles

Section 2.1 has been updated to give more information of CH2018 and Hydro-CH2018 in line with additional reviewer comments hereunder. Line 145 to 164 now reads.

Here we use CH2018 climate simulations based on the EURO-CORDEX regional climate modeling ensemble. In CH2018 near-surface air temperatures was downscaled by applying a statistical bias-correction and downscaling method (Quantile Mapping, a purely statistical and data-driven method) to the original output of all EURO-CORDEX climate model simulations, as observational reference station observations and observation-based gridded analyses were used (CH2018, 2018, Chapter 5). These data are available as both gridded and local station products (CH2018 Project Team, 2018). Following CH2018, the Hydro-CH2018 project analyzed the effects of climate change on Swiss water bodies (FOEN, 2021). The gridded climate product from CH2018 was used to construct projections of future river discharge for 4 hydrological models used in Hydro-CH2018. The location where output from these 4 models was used in this study is shown in Figure 2a including: (M<sub>1</sub>) PREVAH-WSL a conceptual process-based model (Brunner, et al., 2019a; Brunner, et al., 2019b) and (M<sub>2</sub>) PREVAH-UniBE (Muelchi et al., 2021), (M<sub>3</sub>) HBV Light-UniZH a bucket-type hydrological model (Freudiger et al., 2021), and (M<sub>4</sub>) AlpineFlow-EPFL the snowmelt and runoff model Alpine3D coupled to the semi-distributed hydrological model StreamFlow (Michel et al., 2022). The Hydro-CH2018 project produced projections for 61 out of the 82 FOEN river monitoring stations under 22 GCM-RCM model chains (9 GCM coupled to 8 RCM runs) with 0.11° and 0.44° resolution and 3 climate change scenarios (RCP2.6, 4.5, and 8.5). The available projections, the employed circulation and hydrological models, and the considered climate change scenarios for all the different stations that were considered in this study are summarized in Table 1.

L151: I might have missed it, but how many monitoring stations are eventually used in the study? If these are the stations on Fig. 1 panel a, provide a reference to that fig (also for its other panels).

We used in total 82 stations (Figure 2 a and b). This is described in section 2, which has been revised for clarity. Line 113 to 116 now reads.

All available model configurations (i.e., 3,4,5,6,7 and 8 different parameter combinations and implementations) were evaluated for their applicability to different thermal river regimes (Appendix A) and allowed for developing optimal site-specific models for all the 82 thermal river monitoring stations of the Swiss Federal Office of the Environment (FOEN).

L167: DIS criterion: what is the threshold used to assume horizontal distance is “minimal”? & L168: how is the representativeness of the meteorological stations to upstream drainage area assessed?

Line 191 to 201 in Section 2.2 now reads:

Meteorological stations were subsequently paired with hydrological stations such that (a) the horizontal distance between river and meteorological stations was as small as possible i.e. nearest to nearest (criterion *DIS*), (b) the meteorological station was representative for the conditions in the upstream drainage area composing a meteorological station being located in the same valley and upstream (criterion *DRA*), and (c) the elevation difference did not exceed a reasonable threshold of 200 m (criterion *ELE*). Where possible, all three criteria were met, that is the closest station passed both *ELE* and *DRA* and are noted as *DIS* in Table 2. If the closest station were deemed not to be representative (e.g. in a neighboring valley or downstream) the *DIS* criteria where failed, such a station are noted as *DRA* in Table 2. If a station failed both *DIS* and *DRA* but passed *ELE* it is noted as *ELE* in Table 2. Station details and pairings are summarized in Table 2.

Table 2: I would suggest to move this table to the appendix, as it is very extensive and does not add much to the results.

Table 2 has been moved to appendix

L179: “were already statistically downscaled”, please add details on how this is done. This could be part of the paragraph where the CH2018 scenarios are explained in more detail. Also, how big is the bias, and how much would it impact the results?

See adjusted text above regarding the paragraph where the CH2018 scenarios are explained. The bias for air temperature was small from station to station and while for the projections of future flow it was substantial compared to measurements in the reference period. So large in fact that we needed to the bias correction in section 2.3 in order to apply air2stram and air2water.

L222-228, suggestion to move this paragraph to after the model description.

Paragraph moved to end of section 2.5.Line 295 to 301.

L248-250: The fact that for each river monitoring station, the best water temperature model is employed is a key strength of the study, and should, to my opinion, be more pronounced throughout the study (eg intro describing the gap on this, abstract and earlier in the methods where the multi-fidelity is mentioned first).

Added to section 1 line 102 to 107

By grouping catchments together via statistical pattern recognition, we were able to classify rivers (including spring-fed rivers) into 5 different thermal regimes, improving model results by allowing for optimal model selection at each station and enabling regime-specific analyses. The effect on warming by changing river discharge was investigate through a hysteresis analysis. Additionally, we introduce the *extreme event severity* index as an analytic tool to evaluate the change in thermal extreme amplitude.

L287-320: there is some repetition in this section, and parts are more difficult to follow, please consider condensing it retaining the same information

We have rewritten this part. Line 313 to 352 now reads

Both *air2stream* and *air2water* underestimate the annual temperature trend during the reference period on average by 0.14 and 0.11 °C per decade, respectively. For *air2stream*, the annual trend bias is smallest for the *Swiss Plateau* thermal regime (0.09 °C per decade) and largest in the *Alpine* thermal regime (0.17 °C per decade). Seasonally, the trend bias is largest from June to August and September to November, whereas, especially for *air2water*, the bias is small from December to February and March to May.

The divergence of both *air2stream* and *air2water* models from observed trends warrant a post simulation bias correction of simulated trends. The bias is river station dependent, making an individual correction at each station preferable (Tables B3 to B6 in Appendix B). However, only about 30% of the river stations investigated have long enough data sets (30 years) for individual correction. Therefore, we tied the seasonal trend bias correction to the thermal regime, thereby keeping the correction linked to local conditions. Note that no river station of the *Spring* thermal regime had enough data to allow for the trend bias correction. *Spring* river stations were therefore not trend bias corrected. As the trend bias correction is acting on climate simulations of river temperature stretching from 1990 to 2099, the bias correction had to be scaled towards how air temperature trends shift in the climate models. The scaling was designed such that it did not affect the bias correction during the reference period (1990 to 2019), while adjusting the correction towards how the air temperature trend ( $TTair$ ) changes in the near- (2030 to 2059) and far-future (2070 to 2099). For this purpose, an adjustment factor  $Fs$  (-) was constructed from the mean climate models air temperature trends for each climate scenario.  $Fs$  is thus specific for each climate scenario, river station and season.

$$Fs_{i,s} = \frac{TTair_{i,s}}{TTair_{ref,s}} \quad (2)$$

Here  $TTair_{i,s}$  is the mean of the air temperature trends from the climate models, which is changing for each season and with the reference, near- and far-future periods,  $TTair_{ref,s}$  is the mean of the seasonal air temperature trend during the reference period,  $i$  is the number of days, and  $s$  denotes the season. The temporal gaps between 1990 to 2019, 2030 to 2059 and 2070 to 2099, during which the air temperature trends were calculated, were linearly filled with shape-preserving piecewise cubic interpolation resulting in a continuous *factor*  $Fs_{i,s}$  from 1990 to 2099.  $Fs_{i,s}$  varied from -2 to +3 depending on the season and climate scenario and was applied for simulations using discharge input from models  $M_1$  to  $M_3$ , while for simulations using  $M_4$ ,  $Fs_{i,s}$  was set to 1 from 1990 to 2099 due to too short simulation time frames in  $M_4$  (only one decade). With  $Fs_{i,s}$ , the seasonal and thermal regime dependent water temperature bias  $Tb_{i,s}$  (regime dependent mean from Table C3 to C6 in Appendix C) is turned into the thermal regime and climate scenario dependent seasonal bias correction  $Bc_s$  (°C day<sup>-1</sup>)

$$Bc_s = \sum_{i=1}^{i=n} Fs_{i,s} * Tb_{i,s} \quad (3)$$

where  $n$  is the number of days since 1<sup>st</sup> of January 1990. Before adjusting the water temperature model output from 1990 to 2099, the seasonal  $Bc_s$  was combined into a continuous dataset  $Bc$ . To avoid a sharp shift in  $Bc$  between each season, a 3- to 5-day gap in between each season was smoothed with shape-preserving interpolation (Piecewise cubic Hermite interpolation, PCHIP; Matlab R2022a).

L332: could you give a more explicit explanation of a hysteresis example here, relevant for Swiss rivers?

Yes, paragraph has been updated on line 357 to 365

Hysteresis, wherein a dependent variable (water temperature or suspended sediments) can exhibit multiple values in response to a single value from the independent variable (discharge), is a common phenomenon in hydrology (Gharari & Razavi, 2018). Sediment transport hysteresis can be caused in rivers by emptying and refilling of sediment layers on the river bed (Tananaev, 2012) and through erosion on land as shown in the Alps with the contributing location (river bed or eroded area) determining the hysteresis loop shape and rotation direction (Misset et al., 2019). Stream temperature can also show hysteresis effects, example being a lag in the response to air temperature caused by ice-melt or reservoir release (Van Vliet et al., 2011; Webb & Nobilis, 1994).

L357-361: this is a good example of lines that could be shortened.

Now on line 390 to 393

Extreme conditions depend on what is considered to be extreme in relation to normal conditions (Stephenson, 2008). Here, water temperatures are considered to be extremely high if they exceed the 90<sup>th</sup> percentile during the 30-year reference, near- and far-future periods (IPCC, 2014).

L368-372: if an extreme is defined by the deviation of the 90th percentile compared to the median of a certain 30 year period, why does this period need to be detrended? i.e., there is no certain time (beginning or end of period) where the analysis is carried out? Or am I missing something?

Within a 30-year period (1990 to 2019, 2030 to 2059, 2070 to 2099) small trends from the underlying climate may exist. If such a trend is observable and positive, it means that at the end of the 30-year period it will be easier for a temperature event to be above the 90<sup>th</sup> percentile of the 30-year period compared to during the beginning of the period. These high temperature events could potentially incorrectly be classified as an extreme. By detrending within these 30 years, each extreme candidate will be considered irrespectively of whether it is in the beginning or at the end of the 30 years period.

L396-400: If this info would be presented in a small table, it would be easier to grasp Section 3.2 on hysteresis analysis. For a non-expert in hysteresis, I found the results difficult to interpret. To my opinion, it would be beneficial to provide some guiding sentences on how these results could be interpreted.

Sections 3.2 have been reworked to make it easier for the reader. Line 454 to 486

The hysteresis class could be determined for each station with future and present river discharge (47 out of 82 stations). For all stations, climate scenarios, and climate models, the index found solutions in hysteresis intervals ranging from 164 to 328 days.

During the reference period the dominant hysteresis class was IV (45.6%) followed by III (25.0%), -I (14.7%), -II (11.8%) and I (2.9%) while no stations belonged to class II. For the reference period the classes remained independent in relation to the climate scenario (RCP8.5, 4.5, 2.6) or hydrological model (M1, M2, M3) used, while in the near- and far-future differences start to show. For RCP8.5 in the far-future period the dominant class was -I (48.5%) followed by class IV (33.8%), III (13.2%) and -II (4.4%).

For the RCP8.5 scenario classes are shown for the reference, near- and far-future periods in Table 3 (hysteresis classes for RCP4.5 are shown in Table B9, and for RCP2.6 in Table B10, both in Appendix B). Under RCP8.5, the number of stations which changed hysteresis classes between the reference and the near-future was 23%, increasing to 51% until the far-future. Correspondingly, under RCP4.5, 23% had changed hysteresis classes when reaching the near-future, while 38% of the stations changed classes until the far-future. Under RCP2.6, 28% of stations had changed classes until the near-future, but once reaching the far-future, some stations changed back again and the fraction of stations that were in a different hysteresis class compared to the reference period was reduced to 21%.

Considering only the far-future period (2070 to 2099), stations belonging to the Swiss Plateau thermal regime showed the largest change in hysteresis loop classes, with 58% changing under RCP8.5, 42% under RCP4.5 and 12% under RCP2.6. Considering again only the far-future, stations belonging to the Regulated thermal regime exhibited hysteresis loop class changes of 50% under RCP8.5, 33% under RCP4.5 and 50% under RCP2.6. Least prone to hysteresis class changes in the far-future were stations of the Alpine thermal regime (38% under RCP8.5 and RCP4.5, 23% under RCP2.6). Out of the 20 Downstream Lake thermal regime stations only 2 stations were investigated with discharge (i.e. model with air2stream instead of air2water). From these 2 stations, 1 changed hysteresis class with RCP8.5 by the far-future, 1 with RCP2.6 but none with RCP4.5. As can be seen from 4 representative stations for the Swiss Plateau, Regulated, Alpine, and Downstream Lake illustrated in Figure 5, a change in hysteresis class is usually associated with a counterclockwise rotation and stretching of the loop from, for example from a lower to a higher class (III to IV). Such a rotation and stretching appears as a result of increased warming in summer combined with a decrease in summer discharge, while warming in winter is smaller than in summer and discharge is increasing.

Section 3.3 and figure 6. It should be more clear from the start of the paragraph that the “extreme event severity index” is used, so the values do not represent absolute extremes, but deviations from the “normal” in the respective period. L477-479 indicate this, but it should be more up front in the paragraph and figure to avoid confusion for the reader.

Section 3.3 has been updated following the reviewer's comment. Line 495 to 523

The analysis is focused on temperature extremes in the summer months (June to August), during which the severity of extremes varies in between climate scenarios and is different on individual station basis and on a thermal regime basis (Figure 6). Note that the use of extreme event severity as an index should be viewed as the minimum temperature increase of extreme events in the future while it denotes the increase of the 90<sup>th</sup> percentile. From the reference (1990 to 2019) to the far-future (2070 to 2099) period the extreme event severity for scenario RCP2.6 increased on average by +0.20 °C (Figure 6a), by +0.38 °C for RCP4.5 (Figure 6 b) and by +0.61 °C for RCP8.5 (Figure 6 c).

Looking at extreme events at the level of thermal regimes, during the reference period (1990 to 2019), the most severe extreme temperatures occurred at stations in the *Swiss Plateau* and *Downstream Lake* thermal regimes. *Swiss Plateau* thermal regime (mean extreme event severity +2.8 °C) *Downstream Lake* (+2.2 °C), *Regulated* (+1.3 °C), *Alpine* (+1.1 °C) and *Spring* thermal regimes (+0.12 °C).

For all climate scenarios and all thermal regimes, the severity of extreme events increased throughout the 21<sup>st</sup> century. For the far-future (2070 to 2099), under all climate scenarios the *Swiss Plateau* and the *Downstream Lake* thermal regime stations remain as the stations with the severest extreme events, while the increase in extreme event severity increases the most for the *Regulated* and the *Swiss Plateau* thermal regimes. As the *Swiss Plateau* and *Regulated* thermal regime stations are mostly located in the Swiss low land in the Northwestern part of Switzerland (see Figure 2b), they are the ones that are expected to experience the most severe low flow conditions, especially in summer months under the RCP8.5 scenario, with a discharge reduction ranging from 5 to 60 % (FOEN, 2021; Brunner, et al., 2019; Brunner, et al., 2019; CH2018, 2018). The largest increase from the reference to the far-future period was found at stations for the *Regulated* thermal regime (mean extreme event severity increase RCP2.6: +0.28 °C, RCP4.5: +0.54 °C, RCP8.5: +0.93 °C) followed by the *Swiss Plateau* (RCP2.6: +0.26 °C, RCP4.5: +0.48 °C, RCP8.5: +0.78 °C), *Alpine* (RCP2.6: +0.23 °C, RCP4.5: +0.45 °C, RCP8.5: +0.68 °C), *Downstream Lake* (RCP2.6: +0.23 °C, RCP4.5: +0.40 °C, RCP8.5: +0.61 °C) and *Spring* thermal regimes (RCP2.6: +0.01 °C, RCP4.5: +0.01 °C, RCP8.5: +0.03 °C).

L515-525: these are very general sentences which fit better in an introduction section than in a conclusion

Sentences has been moved to the introduction. Line 80 to 90

The study of climate change includes the investigation of physical processes on global, regional and local scales. As scales change so too does the required level of detail needed to resolve the different water cycle components that are relevant on the respective scale. An ideally suited approach to address this challenge in hydrological modeling is a multi-fidelity model framework, which combines multiple computational models of varying complexity in an automated selection framework that ensures robust predictions while limiting the computation to only the necessary level of detail (Fernández-Godino, 2023). The use of process dependent fidelity ensures proper representation of physical processes on regional to local scales while keeping computational costs to a minimum. Multi-fidelity modeling is especially useful when acquiring high-accuracy data is costly and/or computationally intensive, as is the case for climate change impact assessment on the hydrological cycle.

L525: why are the water temperature models of “lower fidelity”?

Due to the simplified level of detail. The water temperature models used here are semi-empirical, meaning detailed physical representation has been simplified thus the low fidelity. The inclusion of empirical climate models brings a high-fidelity element to our study. Importantly, the use of low fidelity water temperature models enables us to use the full set of climate models, and not a selection of representative models required while using high fidelity water temperature models (e.g. Michel et al. 2022), in our nationwide study.

L587-593: why is it important to study these hysteresis effects?

A change in hysteresis as described here with elongated loops points to an added warming effect caused by a decrease in the amount of water being heated, i.e. a change in physical function as less water is more easily heated.

L605-614: I would move these lines to the results section, and provide more explanations on the differences between thermal regimes here in the discussion.

Text worked into section 3.3. see above. Section 4.4 on line 657 to 670 now reads

The here proposed *extreme event severity index* together with a removal of the climatic trend during each period, allowed us to investigate the change in the baseline of extreme temperature under each thermal regime considered here. The index is independent of past extreme conditions and relate extremes to the time period being investigated. Like for the water temperature warming rates and trends, the severity of temperature extremes was impacted the most by the choice of the climate scenario, similarly so for thermal regimes as a whole and for individual stations. The largest increase of river temperature extremes occurred under the RCP8.5 scenario, followed by the RCP4.5 scenario. Noteworthy is that under the RCP2.6 scenario, extreme event frequency and severity stayed more or less constant throughout the 21<sup>st</sup> century. As the discharge projections have been directly considered in the employed multi-fidelity modeling approach, the strong increase in extreme event severity for these stations is thus a direct result of the expected increased occurrence of low flow events, while the seasonal near-surface air temperature changes are mostly responsible for an increasing median of river water temperatures.

L634-652: same comment as above, these lines are more for the results section, which would make that section more digestible.

Text moved to section 3.4 line 530 to 548

Textual comments

L93-94: “multi-fidelity modelling” and “from multiple different fidelity levels”, I would avoid such repetitions in the same sentence

Now reads on line 109 to 111

In this study a multi-fidelity modeling approach using two semi-empirical surface water temperature models, air2water and air2stream (Toffolon & Piccolroaz, 2015; Piccolroaz et al., 2013), was employed.

L111-114: this is repetition of what is said above

Removed

Caption Table 1: “hydraulic models” or “hydrological models”?

Corrected

L161: “Only stations...”, hydrological measuring stations are meant here, I suppose?

## Corrected

L170-172: “For situations ...”, You lost me in this sentence. Would it be possible to reformulate more clearly?

Section re-written, see above section 2.2

L374: section title: indicate that the thermal thresholds are for fish.

## 2.9 Thermal thresholds for fish

L421-422: reformulate “at for each station for with ...”

Now on line 454 to 456 reads

The hysteresis class could be determined for each station with future and present river discharge (47 out of 82 stations). For all stations, climate scenarios, and climate models, the index found solutions in hysteresis intervals ranging from 164 to 328 days.

L667: suggestion to just name this section “5. Conclusions”

## 5. Conclusions
